# Supplementary material for: Opportunities for Comprehensive Medication Management (CMM) for Children with Special Healthcare Needs and Medical Complexity (CSHCN-CMC): The Methodology of a Prospective Case Series within a Collaborative Practice Agreement (CPA)
Source: Preprints.org preprint supplement (doi:10.20944/preprints202211.0196.v1), 2022-11-10
Supplement: Supplementary file 1 [file supplementary]

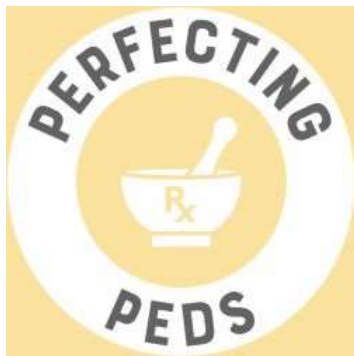

Consent to the Voorhees Children's Center Caregiver Collaborative Practice Agreement.

Patient Name:

Date of birth:

I hereby consent to enter into a Collaborative Practice Agreement with a pharmacist:

1. I recognize that this allows qualified pharmacists working within the context of a defined protocol to take professional responsibility for:
  - a. Conduct patient evaluations
  - b. Advice
  - c. Referred
  - d. Order lab tests
  - e. Administering drugs
  - f. Select, initiate, monitor, continue, and adjust medication regimens
2. I acknowledge that the insurance provider may not cover services provided under collaborative drug therapy management, in which case Perfecting Peds will cover the cost.
3. I recognize that covering physicians and/or pharmacists can be used in the collaborative management of drug therapy.
4. I recognize that I have the right to opt in and withdraw from collaborative medication therapy management.

Adult Caregiver

Name:

Date:

Signature of the adult caregiver:

*N.J. Admin. Code § 13:39-13.6*
